# Supplementary material
Source: Springer Nature journal article supplement (https://www.springermedizin.de/resource/supplementary/12865_2012_519_MOESM2_ESM.pdf/9428130)

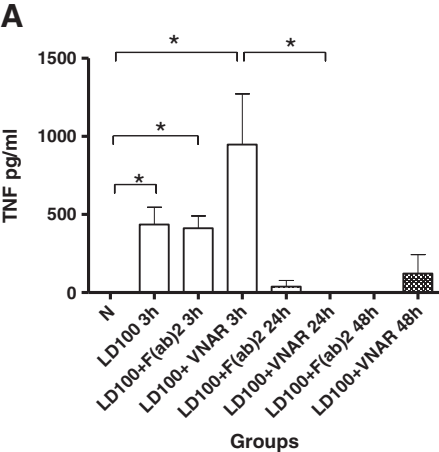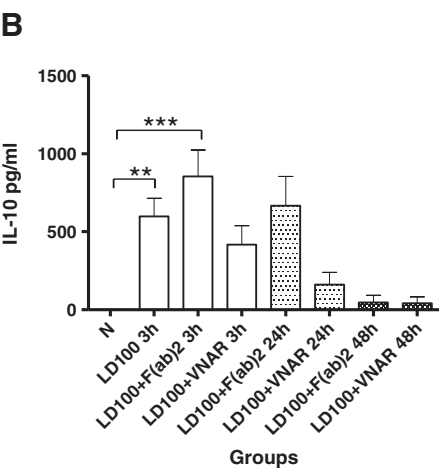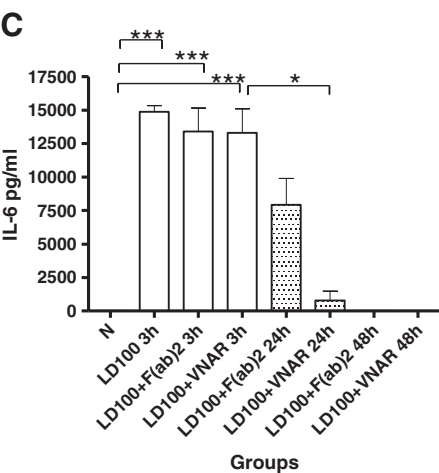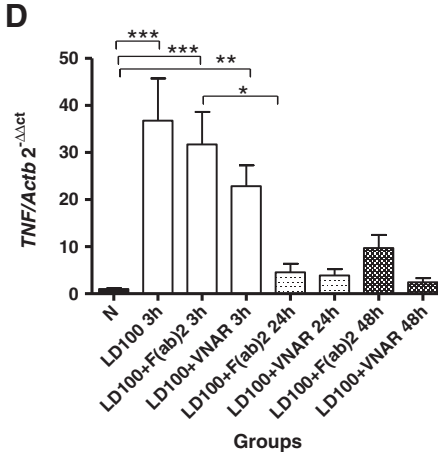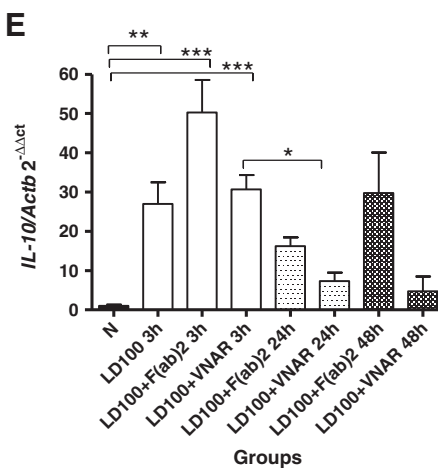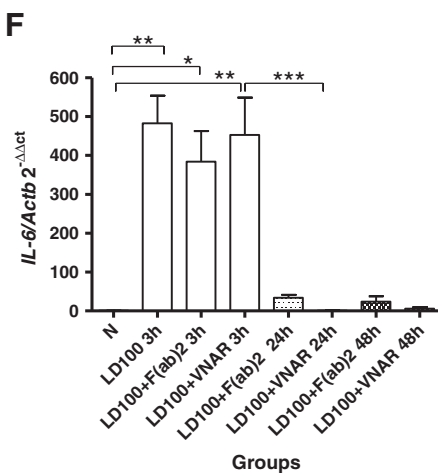

Supplement: MOESM2 [file 9428130]
